# Supplementary material for: GNAQ-Regulated ZO-1 and ZO-2 Act as Tumor Suppressors by Modulating EMT Potential and Tumor-Repressive Microenvironment in Lung Cancer
Source: MDPI journal article supplement (doi:10.3390/ijms24108801), 2023-05-15
Supplement: s1 [file s1]

**GNAQ-regulated ZO-1 and ZO-2 Act as Tumor Suppressors by Inhibiting EMT Potential and Tumor-repressive Microenvironment in Lung Cancer**

**Supplementary Materials**

**Supplementary Table S1.** List of siRNAs used in transfection.

| siRNA/miRNA   | Strand    | Nucleotide sequence       |
|---------------|-----------|---------------------------|
| Control siRNA | Sense     | 5'-CCUACGCCACCAAUUUCGU-3' |
|               | Antisense | 5'-ACGAAAUUGGUGGCGUAGG-3' |
| TJP1 siRNA    | Sense     | 5'-GGAUAGAAGUGCAAGUAGA-3' |
|               | Antisense | 5'-UCUACUUGCACUUCUAUCC-3' |
| TJP2 siRNA    | Sense     | 5'-GACAAGGUGUCAAAACCAU-3' |
|               | Antisense | 5'-AUGGUUUUGACACCUUGUC-3' |
| GNAQ siRNA    | Sense     | 5'-AGUGUACCAGUUUACAGAU-3' |
|               | Antisense | 5'-AUCUGUAAACUGGUACACU-3' |

**Supplementary Table S2.** List of primer sequences used in qRT-PCR experiments.

| Gene           | Primer  | Nucleotide sequence             |
|----------------|---------|---------------------------------|
| TJP1           | Forward | 5'-CCAGAAATACCTGACGGTGC-3'      |
|                | Reverse | 5'-TGTCTGTGCTCATAGCCTTG-3'      |
| TJP2           | Forward | 5'-CAAAACCATTCACAGCCCC-3'       |
|                | Reverse | 5'-CCGGACACTGCAATTC AAA-3'      |
| Arg-1          | Forward | 5'-CTTGGCAAAAGACTTATCCTTAG-3'   |
|                | Reverse | 5'-ATGACATGGACACATAGTACCTTTC-3' |
| CCL18          | Forward | 5'-TGGCAGATTCCACAAAAGTTCA-3'    |
|                | Reverse | 5'-GGATGACACCTGGCTTGGG-3'       |
| CD206          | Forward | 5'-TGAATTGTACTGGTCTGTCCT-3'     |
|                | Reverse | 5'-CTGTGGTGCTGTGCATTTATCT-3'    |
| GNAQ           | Forward | 5'-TGGAGTCCATCATGGCGTG-3'       |
|                | Reverse | 5'-CACTCTCTCCTGTCCCGAGC-3'      |
| $\beta$ -actin | Forward | 5'-GCCAACAGAGAGAAGATGACAC-3'    |
|                | Reverse | 5'-GTAACACCATCACCAGAGTCCA-3'    |

## Supplementary Figures

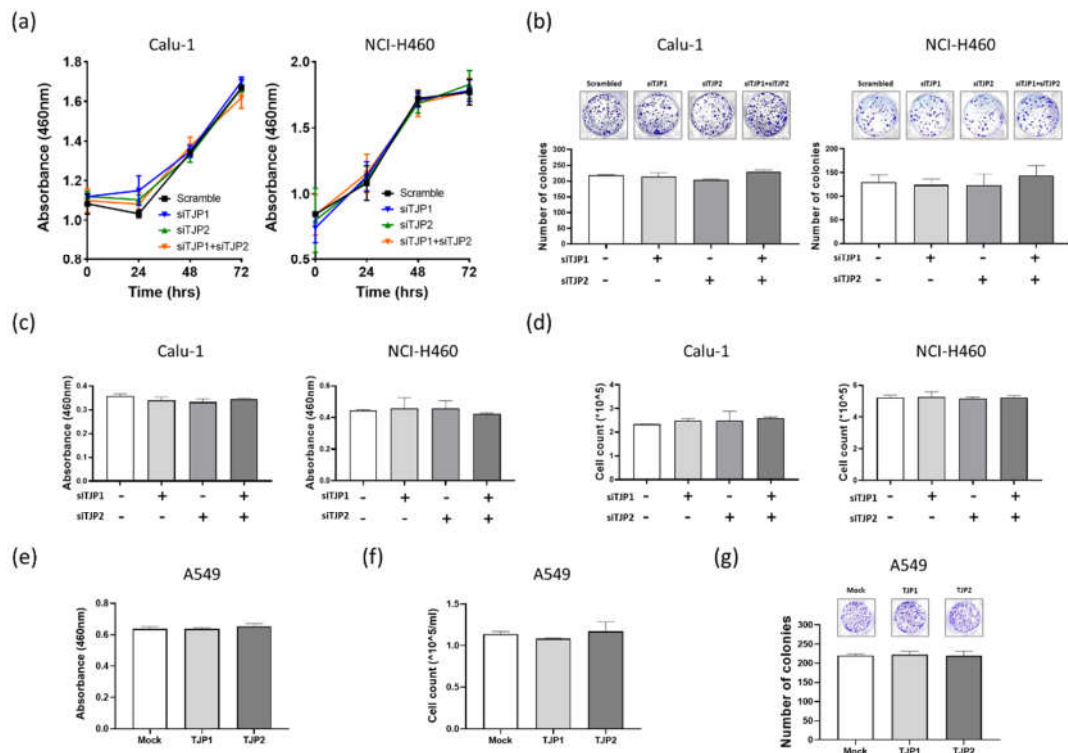

**Supplementary Figure S1.** ZO-1 and ZO-2 do not affect the cell proliferation of lung cancer cells

(a) The cell growth was examined at different time points measured by Cell Counting Kit-8 assay at the absorbance of 450 nm after knockdown of ZO-1 or ZO-2. (b) The growth of lung cancer cells was determined by clonogenic assay at 72 h. (c) The lung cancer cells' viability was examined using Cell Counting Kit-8 at 72 h. The absorbance at 450 nm is presented. (d) Cell viability was assessed by counting the viable cells at 72 h. (e,f) The cell proliferation or viability of ZO-1 or ZO-2 overexpressing A549 cells was determined by Cell Counting Kit-8 or a cell counter at 72 h. (g) Clonogenic assay and quantification of ZO-1 or ZO-2 overexpressing A549 cells, cultured over 2 weeks, followed by crystal violet staining.

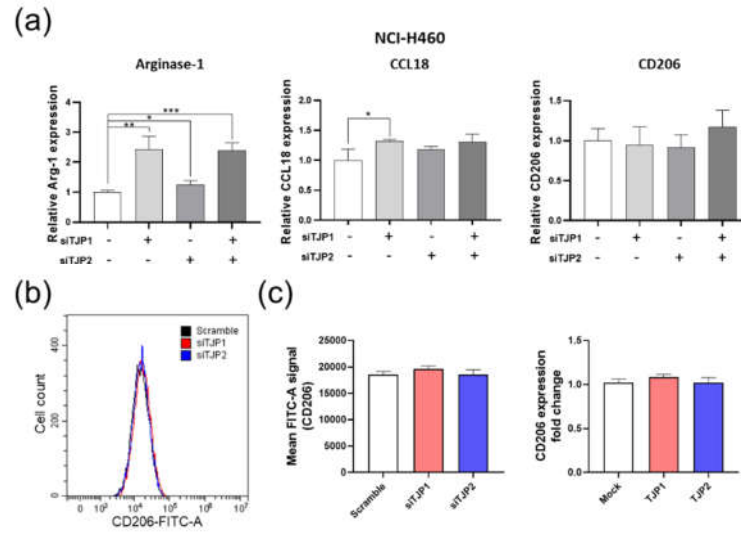

**Supplementary Figure S2.** M2-like phenotypic polarization of THP-1 was not affected by NCI-H460 cells (a) M2 phenotype markers were assessed by qRT-PCR after co-culture with ZO-1 or ZO-2 repressed NCI-H460. (b) Histogram of CD206 expression analyzed by flow cytometry. (c) Raw peak signals of CD206-FITC (left) and their fold changes (right) are shown in the bar graphs.
